# Supplementary material for: The origin of dielectric relaxation behavior in TiO2 based ceramics co-doped with Zn2+, W6+ ions under a N2/O2 sintering atmosphere
Source: Royal Society of Chemistry journal article supplement (doi:10.1039/d2cp05514g), 2023-01-01
Supplement: d2cp05514g1.pdf [file d2cp05514g1.pdf]

## Supplementary Material

### Origin of dielectric relaxation behavior in TiO<sub>2</sub> based ceramics co-doped by Zn<sup>2+</sup>, W<sup>6+</sup> ions

Lin Zhou<sup>a</sup>, Guoyan Yang<sup>a</sup>, Dong Yang<sup>b</sup>, Jinhua Xu<sup>c</sup>, Zhanhui Peng<sup>a, \*</sup>, Di Wu<sup>a</sup>,

Lingling Wei<sup>d</sup>, Pengfei Liang<sup>e, \*</sup>, Xiaolian Chao<sup>a</sup>, Zupei Yang<sup>a, \*</sup>

<sup>a</sup>Key Laboratory for Macromolecular Science of Shaanxi Province, Shaanxi Key Laboratory for Advanced Energy Devices, Shaanxi Engineering Laboratory for Advanced Energy Technology, School of Materials Science and Engineering, Shaanxi Normal University, Xi'an, 710119, Shaanxi, China

<sup>b</sup>Wuzhen Laboratory, Jiaying 314500, China

<sup>c</sup>Jiaying Jiali Electronics Co., Ltd., Jiaying 314003, China

<sup>d</sup>School of Chemistry and Chemical Engineering, Shaanxi Normal University, Xi'an, 710119, Shaanxi, China

<sup>e</sup>School of Physics and Information Technology, Shaanxi Normal University, Xi'an, 710119, Shaanxi, China

\*Corresponding authors:

E-mail addresses: Z. Peng ([pzh@snnu.edu.cn](mailto:pzh@snnu.edu.cn)), P. Liang ([liangpf@snnu.edu.cn](mailto:liangpf@snnu.edu.cn)), Z. Yang ([yangzp@snnu.edu.cn](mailto:yangzp@snnu.edu.cn))

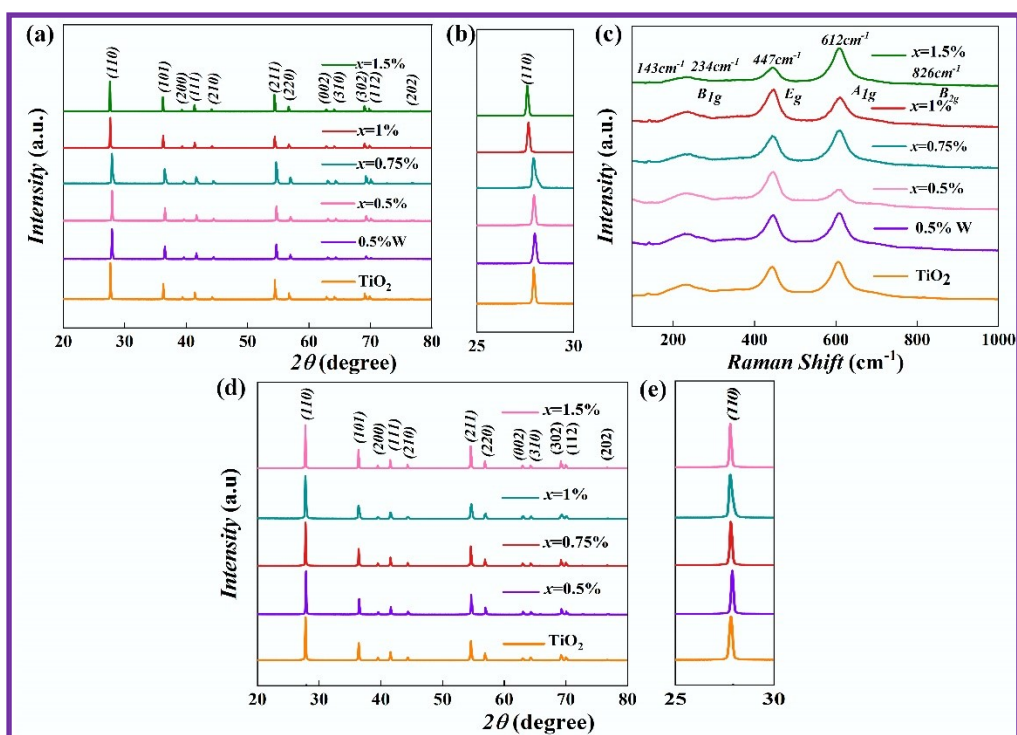

Fig. S1 (a) XRD patterns of ZWTO<sub>x</sub>-N<sub>2</sub> ceramics. (b) Enlarging local detail in range of 25°~30° in XRD patterns of ZWTO<sub>x</sub>-N<sub>2</sub> ceramics. (c) The Raman spectra of ZWTO<sub>x</sub>-N<sub>2</sub> ceramics. (d) XRD patterns of ZWTO<sub>x</sub>-O<sub>2</sub> ceramics. (e) Enlarging local detail in range of 25°~30° in XRD patterns of ZWTO<sub>x</sub>-O<sub>2</sub> ceramics.

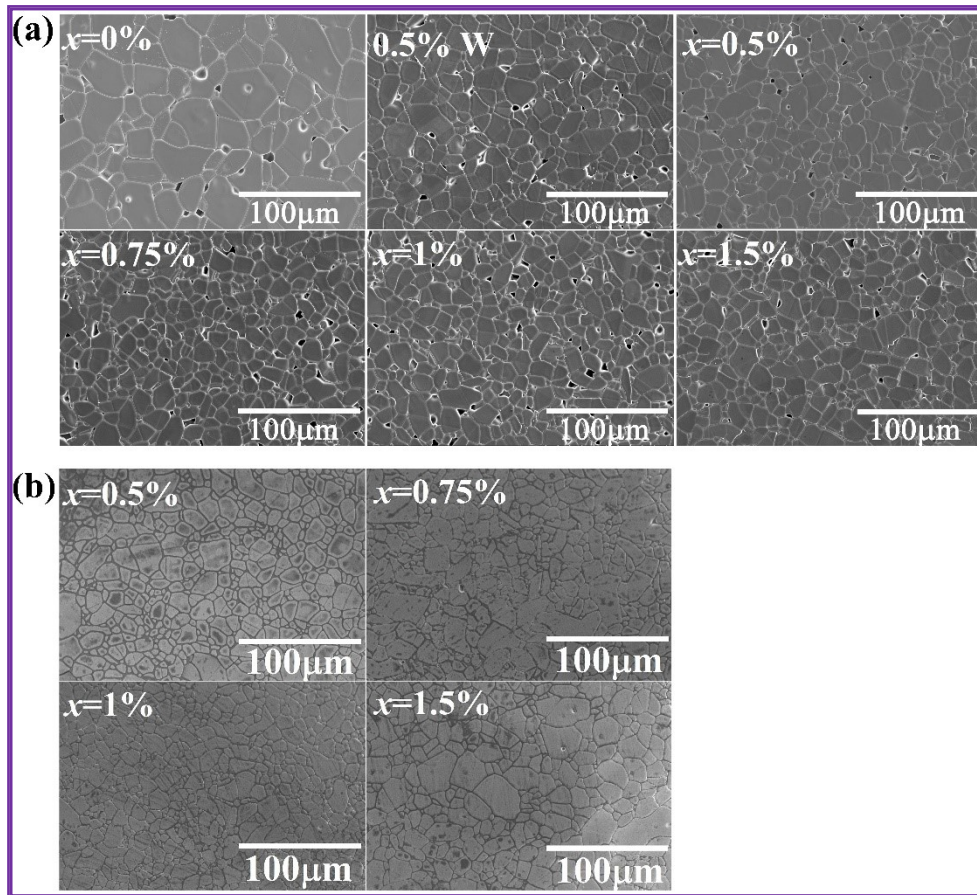

Fig. S2 SEM images of ceramics after thermally etched surface: (a) ZWTO<sub>x</sub>-N<sub>2</sub> ceramics, (b) ZWTO<sub>x</sub>-O<sub>2</sub> ceramics.

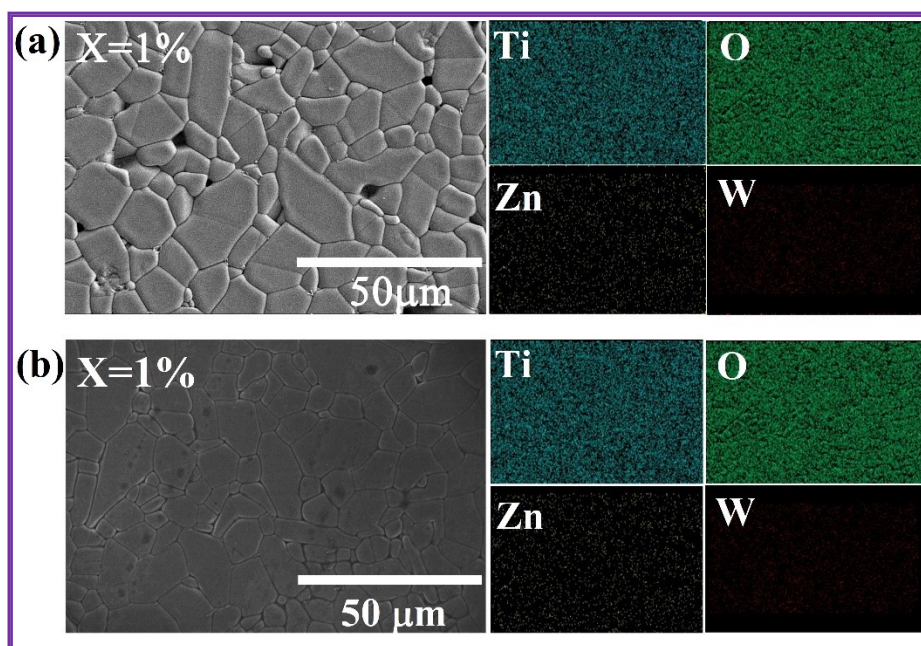

Fig. S3 SEM mapping of ceramics (Ti, O, W, Zn elements): (a) ZWTO<sub>x</sub>-N<sub>2</sub> ceramics, (b) ZWTO<sub>x</sub>-O<sub>2</sub> ceramics.

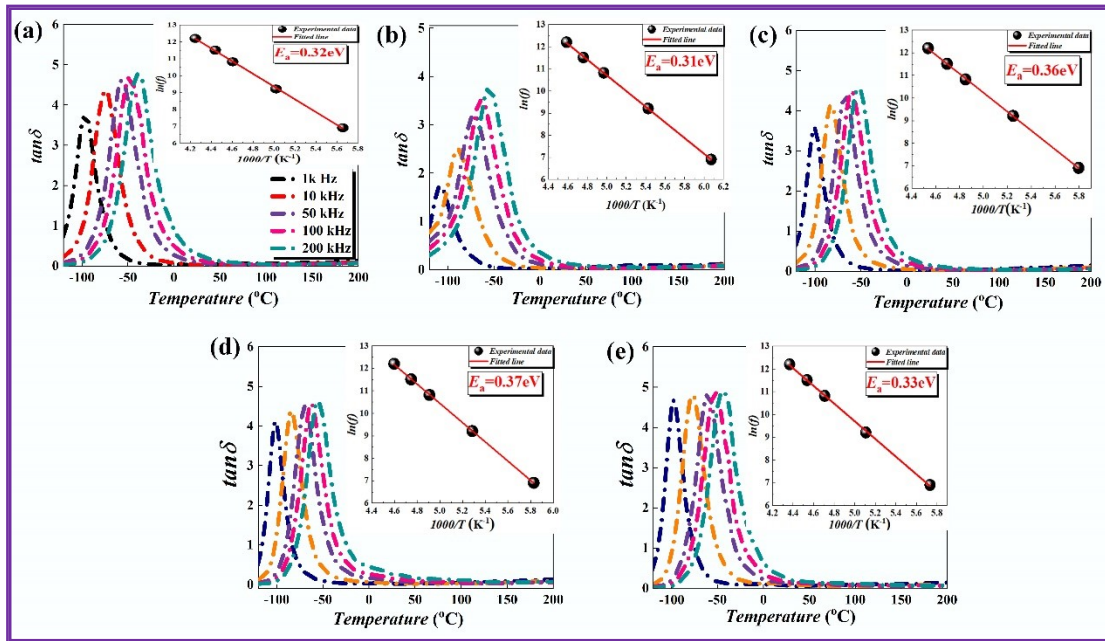

Fig. S4 Temperature dependence of  $\tan \delta$  for ZWTO $_x$ -N $_2$  ceramics at different frequency: (a) 0.5% W, (b)  $x=0.5\%$ , (c)  $x=0.75\%$ , (d)  $x=1\%$ , (e)  $x=1.5\%$ . The inset is activation energies fitted by Arrhenius law.

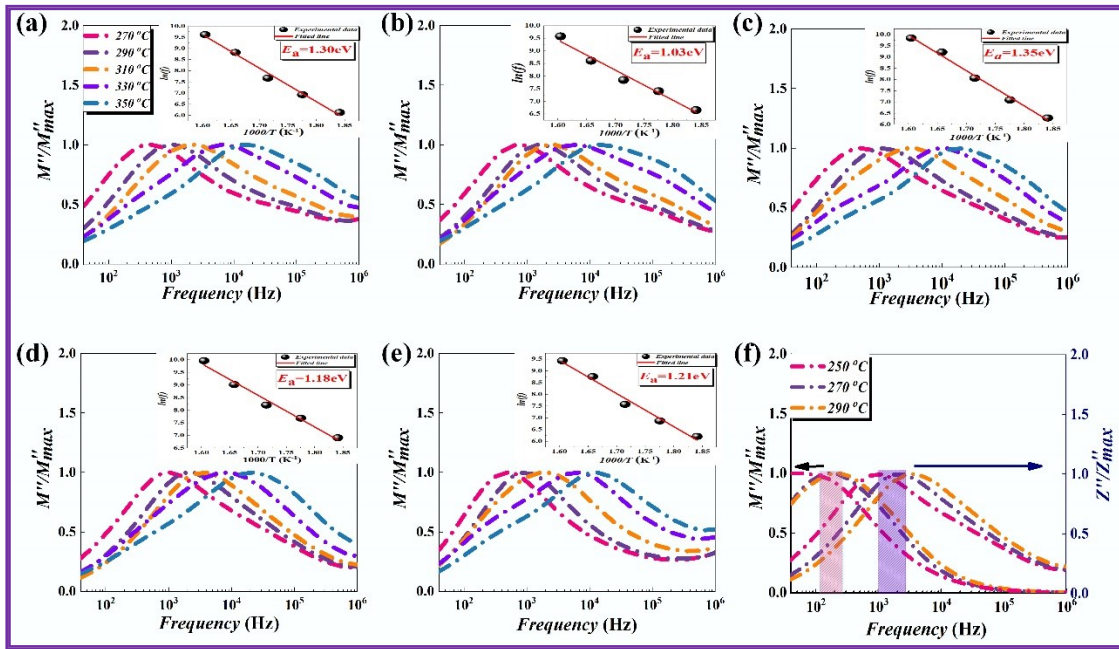

Fig. S5 Frequency dependence of imaginary part of electrical modulus for  $ZWTO_x-N_2$  ceramics: (a) 0.5% W, (b)  $x=0.5\%$ , (c)  $x=0.75\%$ , (d)  $x=1\%$ , (e)  $x=1.5\%$ . The inset is activation energies fitted by Arrhenius law. (f) Frequency dependence of imaginary part of complex impedance and electrical modulus for  $ZWTO_{0.01}-N_2$  ceramics at 250 °C, 270 °C and 290 °C.
